# Supplementary material for: How spin state and oxidation number of transition metal atoms determine molecular adsorption: a first-principles case study for NH3
Source: Royal Society of Chemistry journal article supplement (doi:10.1039/d3cp05042d), 2024-01-01
Supplement: d3cp05042d1.pdf [file d3cp05042d1.pdf]

## Supplementary Information

### How Spin State and Oxidation Number of Transition Metal Atoms Determine

#### Molecular Adsorption: A First-Principles Case Study for NH<sub>3</sub>

Hua-Jian Tan<sup>a, c</sup>, Rutong Si<sup>b</sup>, Xi-Bo Li<sup>d</sup>, Zhen-Kun Tang<sup>e</sup>, Xiao-Lin Wei<sup>f</sup>, Nicola Seriani<sup>b\*</sup>, Wen-Jin Yin<sup>a, b, c\*</sup> and Ralph Gebauer<sup>b</sup>

<sup>a</sup>School of Physics and Electronic Science, Hunan University of Science and Technology, Xiangtan 411201, China

<sup>b</sup>The Abdus Salam International Centre for Theoretical Physics (ICTP), Strada Costiera 11, I-34151 Trieste, Italy

<sup>c</sup>Key Laboratory of Intelligent Sensors and Advanced Sensing Materials of Hunan Province, Hunan University of Science and Technology, Xiangtan 411201, China

<sup>d</sup>Department of Physics, Jinan University, Guangzhou 510632, P. R. China

<sup>e</sup>College of Physics and Electronics Engineering, Hengyang Normal University, Hengyang 421008, China

<sup>f</sup>Department of Physics and Laboratory for Quantum Engineering and Micro-Nano Energy Technology, Xiangtan University, Xiangtan 411105, Hunan, China

Corresponding Emails: [nseriani@ictp.it](mailto:nseriani@ictp.it), [wjin@ictp.it](mailto:wjin@ictp.it)

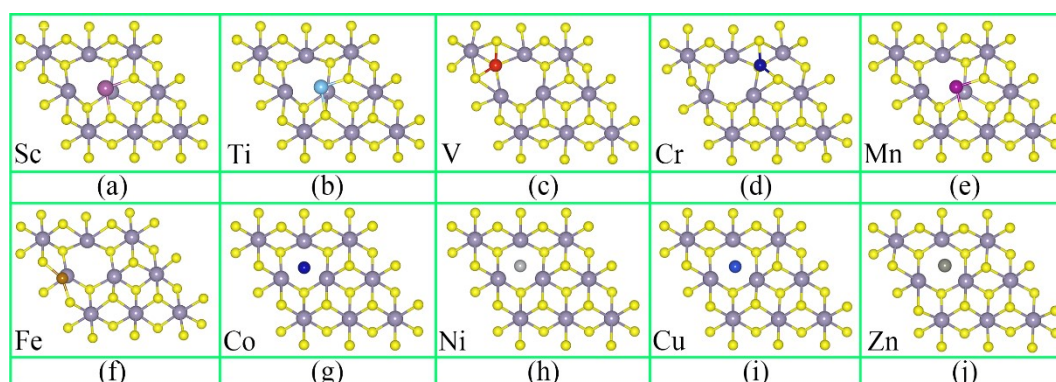

**Fig. S1.** The top views of optimized TM@S<sub>v</sub>-SnS<sub>2</sub> structures, with Sc~Zn atoms correspond to (a)-(j), respectively.

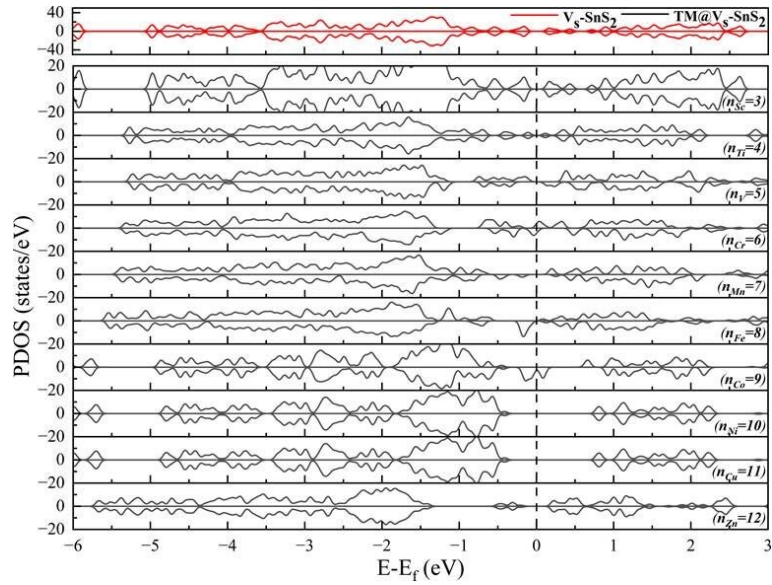

**Fig. S2.** The total electronic density of states for the substrates of  $TM@S_v-SnS_2$  without TM atoms in different electron number  $n$ , together with case of  $S_v-SnS_2$  for comparison.

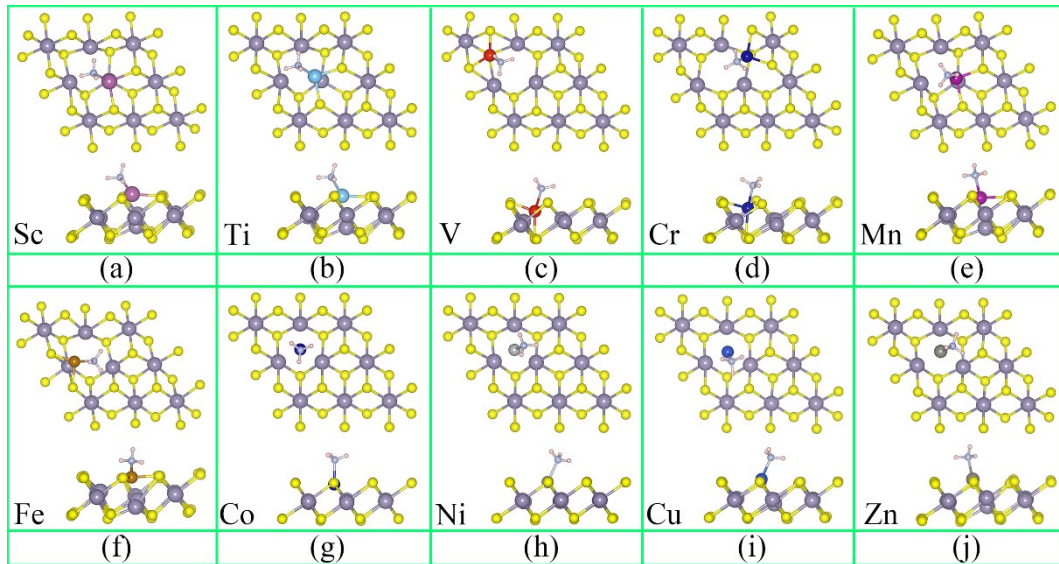

**Fig. S3.** The upper/lower part corresponds to the top/side views of  $NH_3$  adsorbed at  $TM@S_v-SnS_2$  surfaces, with Sc~Zn correspond to (a)-(j). The N and H atoms are in silver white and pink, respectively.

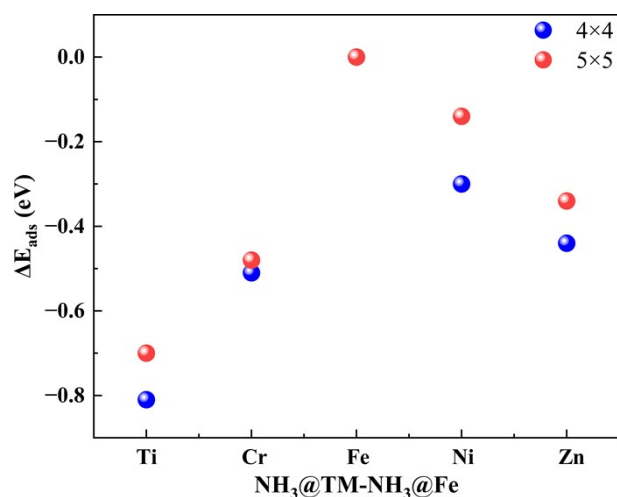

**Fig. S4.** The size effect of supercell on the  $\text{NH}_3$  adsorption at  $\text{TM}@S_v\text{-SnS}_2$  in different even electron number  $n$ . For clear, the highest values for both (4x4) and (5x5) cases are set to zero.

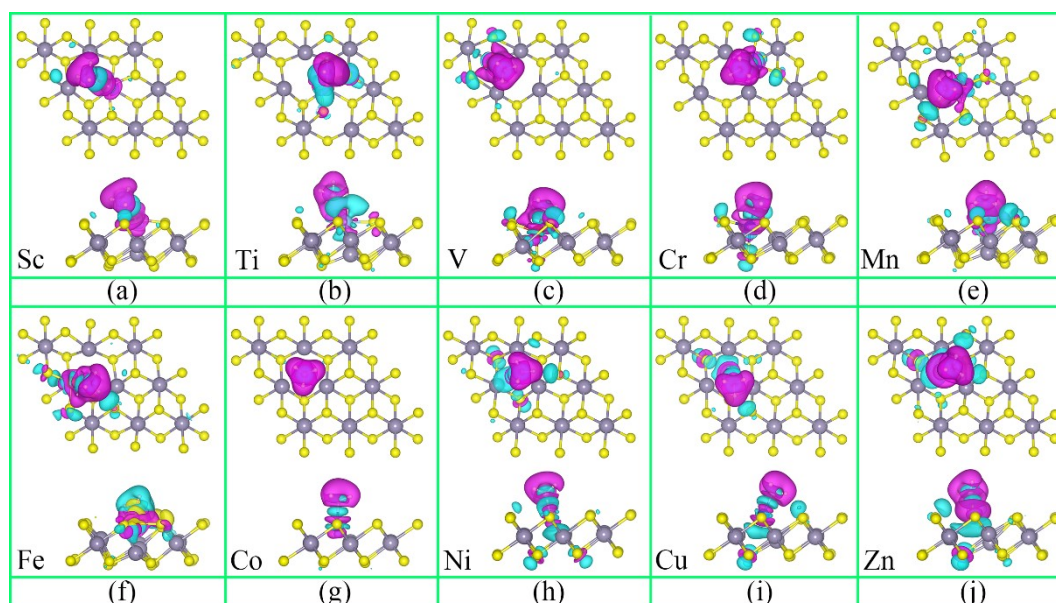

**Fig. S5.** The top and side views of charge density difference of  $\text{NH}_3@TM@S_v\text{-SnS}_2$  structures, with Sc~Zn correspond to (a)-(j), respectively. The purple and cyan areas indicate electron depletion and accumulation, with an isosurface of  $10^{-3} e/\text{\AA}^3$ .

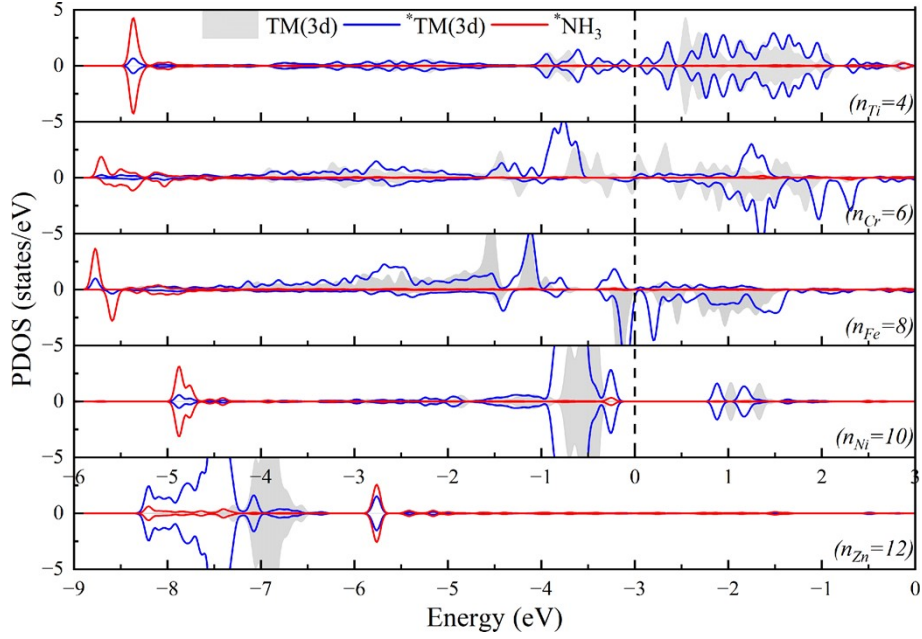

**Fig. S6.** The DOS of  $\text{NH}_3@TM@S_v\text{-SnS}_2$  with TM atoms in even electron number  $n$ . Star \* denotes  $\text{NH}_3$  adsorbed at surface.

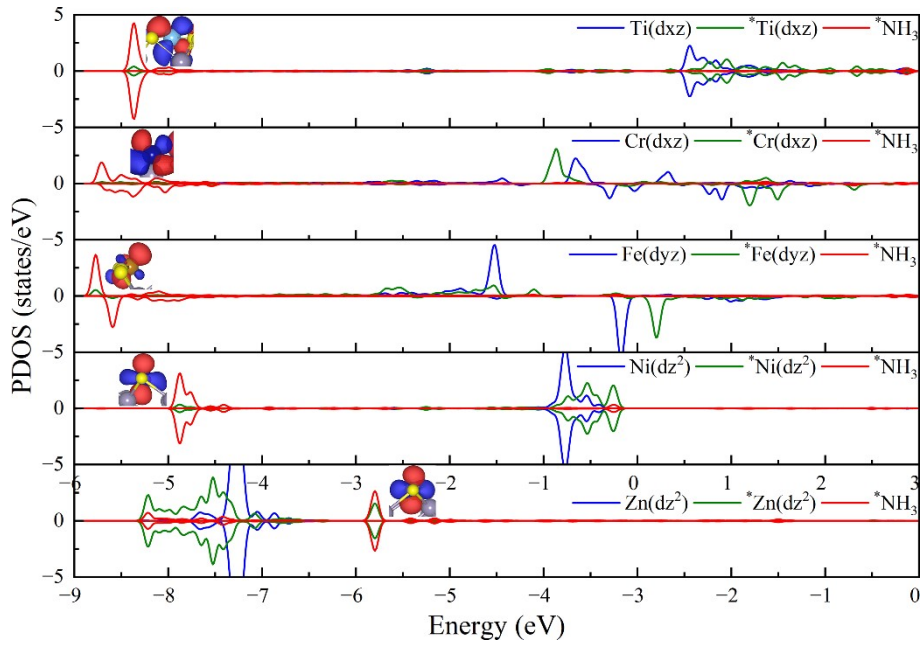

**Fig. S7.** The projected DOS of 3d orbital as well as 3 $\sigma$  orbital of adsorbed  $\text{NH}_3$  for TM atoms in even electron number  $n$ . The corresponding interacted orbitals are also provided in the inset, with an isosurface of  $10^{-7} e/\text{\AA}^3$ , respectively.

|     |                                                                                          |                                                                                                                                                  |
|-----|------------------------------------------------------------------------------------------|--------------------------------------------------------------------------------------------------------------------------------------------------|
| (a) | $V^{2+}$                                                                                 | $Co^0$                                                                                                                                           |
|     | $dx^2-y^2$ —<br>$dxz, dyz, dxy$ $\uparrow$ — —<br>$dz^2$ $\uparrow\downarrow$            | $dz^2$ $\uparrow$<br>$dxz, dyz$ $\uparrow\downarrow$ $\uparrow\downarrow$<br>$dxy, dx^2-y^2$ $\uparrow\downarrow$ $\uparrow\downarrow$           |
|     | $Cr^{2+}$                                                                                | $Ni^0$                                                                                                                                           |
|     | $dx^2-y^2$ —<br>$dxz, dyz, dxy$ $\uparrow$ $\uparrow$ — —<br>$dz^2$ $\uparrow\downarrow$ | $dz^2$ $\uparrow\downarrow$<br>$dxz, dyz$ $\uparrow\downarrow$ $\uparrow\downarrow$<br>$dxy, dx^2-y^2$ $\uparrow\downarrow$ $\uparrow\downarrow$ |
| (b) |                                                                                          |                                                                                                                                                  |
| (c) |                                                                                          |                                                                                                                                                  |

**Fig. S8.** (Color online) (a) The illustration of outermost valence electron filling in the 3d orbitals of TM ions in  $TM@S_n-Sn$  for  $V^{2+}$ ,  $Cr^{2+}$ ,  $Co^0$ , and  $Ni^0$  ions. The corresponding frontier orbitals between  $3\sigma$  of  $NH_3$  and 3d orbital of TM ions with (b)  $dxz$  orbital, and (c)  $dz^2$  orbital, respectively.
